# Supplementary material for: Vapor deposition of polyionic nanocoatings for reduction of microglia adhesion
Source: Royal Society of Chemistry journal article supplement (doi:10.1039/c7ra12728f), 2018-01-01
Supplement: c7ra12728f1.pdf [file c7ra12728f1.pdf]

Supporting information for article:  
**Vapor deposition of polyionic nanocoatings for  
reduction of microglia adhesion**

*Yu Mao\*, Bin Zhi*

*Departments of Biosystems Engineering, Oklahoma State University, Stillwater, Oklahoma 74078,  
United States. E-mail: [yu.mao@okstate.edu](mailto:yu.mao@okstate.edu).*

**MAA**

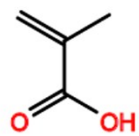

**DMAEMA**

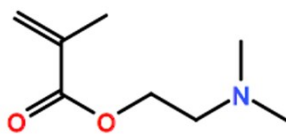

**EGDA**

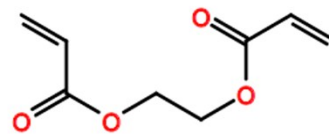

Fig. S1 Chemical structure of monomers MAA and DMAEMA and the crosslinker EGDA.

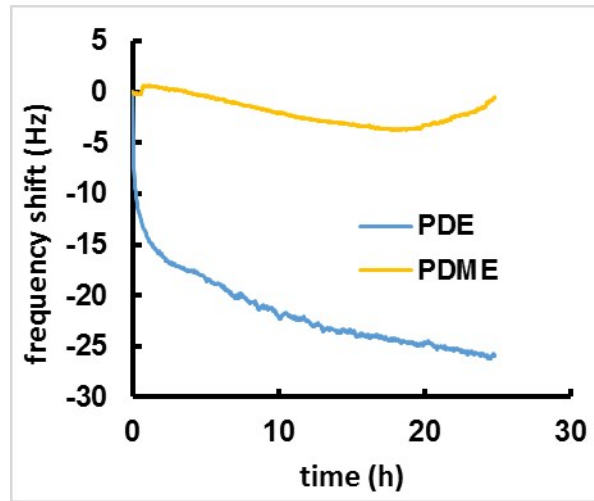

Fig. S2 Dynamics of BSA adsorption on PDE and PDME studied by monitoring the frequency change using QCM.

**Table S1** Assignment of FT-IR absorption bands.

| Wavenumber (cm <sup>-1</sup> ) | Assignment                              | Reference |
|--------------------------------|-----------------------------------------|-----------|
| 2821, 2772                     | C-H stretching in tertiary amine        | 50        |
| 1728, 1735                     | C=O stretching in O=C-O-CH <sub>2</sub> | 42        |
| 1702                           | C=O stretching in O=C-OH                | 49        |
